# Supplementary material
Source: publisher site journal article supplement (https://www.dovepress.com/article/376942)
Supplement: Supplementary file 1 [file get_supplementary_file.php]

| Supplementary Table S1 The stars of studies assessed based on the rewritten NOS | | | | | |  |  |  |  |  |  |  |  |  |  |  |  |  |  |
| --- | --- | --- | --- | --- | --- | --- | --- | --- | --- | --- | --- | --- | --- | --- | --- | --- | --- | --- | --- |
| Authors | Population | Selection (four stars) | | | |  | Comparability (two stars) | |  | Methodology (additional criteria rewritten by us) (four stars) | | | | |  | Deductions (added by us) | | Conclusion | Total stars |
| Case definition | Case representativeness | Community controls | Control definition |  | Age and Gender (matched) | Other factors |  | PCR method | Control of PCR | Subgroup analysis | HWE | Age of onset years |  | inconsistent data | incorrect description |
| Ansari-Lari (2021) [12] | Iran | 1 (DSM-IV) | 1 | 0 (healthy blood donors) | 1 |  | 1 | 0 (education and marital status was different) |  | multiplex PCR | 1 (β-globin as an internal control) | 1(based on antibody to T. gondii) | 0 (hardly calculated) | 1 (25.6±9.2) |  | 0 | 0 | no clear association | 7 |
| Nakamura (2015) [13] | Japan | 1 (DSM-IV) | 1 | 1 (healthy controls from the same geographic region) | 1 |  | 0 (gender matched, age of patients was younger than controls) | 0 (not clear) |  | Taqman qRT-PCR | 1 (RNase P as a single copy number control) | 0 | 1(No deviations) | 0 (not clear) |  | —1 (620 patients in abstract, but 640 cases in the context) | 0 | GSTM1 null was a protective factor but not association in GSTT1 | 5 |
| Pejovic-Milovancevic (2016) [14] | Serbia | 1 (DSM-IV and ICD-10) | 1 (early onset of SZ) | 1 (healthy controls from the same geographic region) | 1 |  | 0 (gender matched, age of patients was younger than controls) | 0 (not clear) |  | multiplex PCR | 1(CYP1A1 as an internal control) | 0 (early onset of SZ, but no subgroup analysis) | 0 (hardly calculated) | 1(16.1±4.7) |  | 0 | —1 (age was significantly different, but descripted incorrectly) | no clear association | 5 |
| Pinheiro (2017) [15] | Brazil | 1 (DSM-IV) | 1(treatment-resistant SZ) | 1(healthy and general population) | 1 |  | 1 | 1 (drinking and smoking was matched) |  | multiplex RT-PCR | 1(RH92600 as a reference gene) | 0 (treatment -resistant SZ, but no subgroup analysis) | 0 (hardly calculated) | 0 (not clear) |  | 0 | 0 | no clear association | 7 |
| Yan (2020) [16] | China | 1 (DSM-IV) | 1 | 1 (healthy controls from the same geographic region) | 1 |  | 1 | 0 (not clear) |  | ordinary PCR | 0 (not clear) | 1 (based on the gender) | 0 (hardly calculated) | 0 (not clear) |  | 0 | 0 | GSTM1 null was a risk factor but not association in GSTT1 | 6 |
| Zhang (2020) [17] | China | 0 (DSM-5 and PANSS) | 1 | 1 (healthy controls from the same geographic region) | 1 |  | 1 | 1 (BMI and marital status was matched) |  | multiplex PCR | 1 (β-globin as an internal control) | 1 (based on the PANSS score) | 0 (hardly calculated) | 1(25.5±6.5) |  | 0 | 0 | GSTT1 null was a protective factor but not association in GSTM1 | 8 |
| Rodríguez-Santiago (2009) [18] | Spain | 1 (DSM-IV) | 1 | 1 (healthy controls from the same geographic region) | 1 |  | 0 (not matched) | 0 (not clear) |  | MLPA | 1 (individuals with two copies as reference) | 0 (Genomic CNVs was discussed) | 0 (hardly calculated) | 0 (not clear) |  | —1 (the added numbers of GSTM1 and GSTT1 were inconsistent and not equal to 654 in Table 1) | —1 (451 males and 204 females were not equal to 654 patients) | GSTM1 null was a protective factor but not association in GSTT1 | 3 |
| Gravina (2011) [19] | Italy | 1 (DSM-IV and PANSS) | 1 | 1 (healthy controls from the same geographic region) | 1 |  | 1 | 0 (not clear) |  | multiplex PCR | 1 (β-globin as an internal control) | 0 | 0 (hardly calculated) | 1(23.8±8.2) |  | 0 | 0 | no clear association | 7 |
| Harada (2001) [20] | Japan | 1 (DSM-IV) | 1 | 1 (healthy controls from the same geographic region) | 1 |  | 1 | 0 (not clear) |  | PCR/long fragment PCR | 1 (β-globin and CCK as internal controls) | 1 (based on the disease subtypes) | 1(No deviations) | 0 (not clear) |  | —1 (176 controls in abstract, but only 117 in the context) | 0 | GSTM1 null was a risk factor | 7 |
| Kashani (2012) [21] | Iran | 1 (DSM-IV) | 1 | 0 (volunteers from medical and paramedical staff) | 1 |  | 1 | 0 (education, marital status and smoking was not matched) |  | ordinary PCR | 0 (not clear) | 0 | 0 (hardly calculated) | 1(20.8±8.7) |  | 0 | 0 | no clear association | 5 |
| Matsuzawa (2009) [22] | Japan | 1 (DSM-IV) | 1 | 1 (healthy controls from the same geographic region) | 1 |  | 0 (gender matched, age of patients was older than controls) | 0 (not clear) |  | PCR | 1 (β-globin as an internal control) | 1 (based on the disease subtypes) | 0 (HWE could not be done in this situation) | 1(24.9±8.3) |  | 0 | 0 | no clear association | 7 |
| Pae (2004) [23] | South Korea | 1 (DSM-IV) | 1(SZ with TD) | 0 (volunteers from hospital and visitors to health center) | 1 |  | 1 | 0 (not clear) |  | PCR | 1 (β-globin as an internal control) | 0 | 0 (HWE could not be done in this situation) | 0 (data not shown) |  | 0 | 0 | GSTM1 null was a risk factor | 5 |
| Raffa (2013) [24] | Tunisia | 1 (DSM-IV) | 1 | 0 (volunteers from the blood center of hospital) | 1 |  | 1 | 0 (education and marital status was not matched) |  | multiplex PCR | 1 (Albumin as an internal control) | 1 (based on the disease subtypes) | 0 (hardly calculated) | 0 (data not shown) |  | 0 | 0 | GSTT1 null was a protective factor but not association in GSTM1 | 6 |
| Saadat (2007) [25] | Iran | 1 (DSM-IV) | 1 | 0 (healthy blood donors from the same geographic region) | 1 |  | 1 | 0 (education, marital status and smoking was not matched) |  | PCR | 1 (β-globin as an internal control) | 0 | 0 (hardly calculated) | 1(23.6±8.0) |  | 0 | 0 | GSTT1 null was a protective factor | 6 |
| Saruwatari (2013) [26] | Japan | 1 (DSM-IV) | 1 | 1 (healthy controls from the same geographic region) | 1 |  | 1 | 0 (BMI, smoking and other factor was not matched) |  | PCR | 1 (β-globin as an internal control) | 1 (based on the smoking and overweight) | 0 (hardly calculated) | 0 (not clear) |  | 0 | 0 | GSTM1 null was a risk factor for SZ with smoking | 7 |
| Watanabe (2010) [27] | Japan | 1 (DSM-IV) | 1 | 1 (healthy controls) | 1 |  | 0 (gender matched, age of patients was older than controls) | 0 (not clear) |  | TaqMan RT-PCR | 1 (RNase P as a single copy number control) | 0 | 0 (hardly calculated) | 0 (not clear) |  | 0 | —1 (precise data extraction was difficult to performed) | no clear association | 4 |
| PCR, polymerase chain reaction; qRT-PCR, quantitative real-time PCR; RNase P, Ribonuclease P; PANSS, positive and negative syndrome scale; BMI, body mass index; MLPA, multiplex ligation dependent probe amplification; | | | | | | | | | | | | | | | | | | | |
| DSM-IV, the diagnostic and statistical manual of mental disorders on version IV; TD, tardive dyskinesia; HWE, Hardy-Weinberg equilibrium; GSTM1/T1, glutathione S-transferase mu 1/theta 1; CCK, Cholecystokinin; | | | | | | | | | | | | | | | | | | | |
| NOS, Newcastle-ottawa quality assessment scale | | | | | |  |  |  |  |  |  |  |  |  |  |  |  |  |  |

Supplementary Table S2 Newcastle-ottawa quality assessment scale for case control studies rewritten version marked by yellow

**NEWCASTLE-OTTAWA QUALITY ASSESSMENT SCALE**

**CASE CONTROL STUDIES**

Note: A study can be awarded a maximum of one star for each numbered item within the Selection and Methodology categories. A maximum of two stars can be given for Comparability. It can be deducted by up to two stars due to inconsistent data and incorrected description.

**Selection**

1. Is the case definition adequate?

a) yes, with independent validation✸

b) yes, eg record linkage or based on self-reports

c) No description

1. Representativeness of the cases

a) consecutive or obviously representative series of cases✸

b) Potential for selection biases or not stated

1. Selection of Controls

a) community controls✸

b) hospital controls

c) no description

1. Definition of Controls

a) no history of disease(endpoint)✸

b) no description of source

**Comparability**

1. Comparability of cases and controls on the basis of the design or analysis

a) study controls for _______________ (Select the most important factor)✸

b) study controls for any additional factor✸(This criteria could be modified to indicate specific control for a second important factor)

**Methodology**

1. PCR methods of studies selected

a) method of PCR (Select the most important method)

b) unclear

1. Are there controls of PCR?

a) yes, there are positive controls or internal controls✸

b) negative controls

c) unclear

1. Subgroup analysis of case group

a) subgroup analysis of targeted disease or other factors (such as smoking and gender)✸

b) unclear

1. Hardy-Weinberg equilibrium

a) it is performed and it is in Hardy-Weinberg equilibrium✸

b) only one gene is included in the study

c) unable to calculate or unclear

1. Age of onset years

a) it is shown in the studies✸

b) data no shown or unclear

**Deductions**

1. Inconsistent data

a) no

b) there is inconsistent data (minus one✸)

1. Incorrected description

a) no

b) there is incorrected description (minus one✸)
